# Supplementary material
Source: publisher figshare collection journal article supplement (https://acs.figshare.com/ndownloader/files/5829828)
Supplement: Supplementary file 1 [file 5829828]

# A Concise Enantioselective Synthesis of a Key A-Ring Synthone for 1 $\alpha$ -Hydroxyvitamin D<sub>3</sub> Compounds

Hiroko Hiyamizu, Hidenori Ooi, Yoko Inomoto, Tomoyuki Esumi, Yoshiharu Iwabuchi, and  
Susumi Hatakeyama\*

*Faculty of Pharmaceutical Sciences, Nagasaki University, Nagasaki 852-8521, Japan*

## Supporting Information

**General Procedure.** Where appropriate, reactions were performed in flame-dried glassware under an argon atmosphere. All extracts were dried over MgSO<sub>4</sub> and concentrated by rotary evaporation below 30 °C at ca. 25 Torr. Analytical and preparative thin-layer chromatography were performed with Merck F-254 TLC plates. Column chromatography was performed employing silica gel 60 (230-400 mesh ASTM, Merk).

**Materials.** Commercial reagents and solvents were used as supplied with the following exceptions. Tetrahydrofuran (THF) and ether (Et<sub>2</sub>O) were distilled from sodium benzophenone ketyl. Dichloromethane (CH<sub>2</sub>Cl<sub>2</sub>), triethylamine (Et<sub>3</sub>N), and *N,N*-dimethylformamide (DMF) were distilled from calcium hydride. 2-[*N,N*-bis(trifluoromethylsulfonyl)amino]-5-chloropyridine was purified by kugelrohr distillation after washing with 10% NaOH just prior to use.

**Instrumentation.** Infrared spectra were measured on a JASCO FT/IR-230 spectrometer. Optical rotations were recorded on a JASCO DIP-370 polarimeter at ambient temperature. <sup>1</sup>H and <sup>13</sup>C NMR spectra were measured on a Varian Gemini 300 or a Varian Unity plus 500 spectrometer. Chemical shifts are reported in parts per million (ppm) downfield from tetramethylsilane (TMS) in  $\delta$  units and coupling constants are given in hertz. TMS was defined as 0 ppm for <sup>1</sup>H NMR spectra and the center line of the triplet of CDCl<sub>3</sub> was also defined as 77.10 ppm for <sup>13</sup>C NMR spectra. High resolution Mass spectra were measured on a JEOL JMS-DX303.

### (5*S*)-*N*-Methoxy-*N*-methyl-5-hydroxy-3-oxo-6-heptenamide (10).

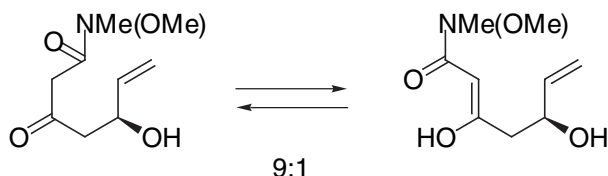

To an ice-cooled solution of *N,O*-dimethylhydroxylamine hydrochloride (737mg, 7.56mmol) in CH<sub>2</sub>Cl<sub>2</sub> (10 ml) was added Me<sub>2</sub>AlCl (0.98 M in hexane, 7.7 ml, 7.56 mmol) and the mixture was stirred for 1 h after removal of the cooling bath. To the resulting mixture was added a solution of **9** (97% ee)<sup>1</sup> (500mg, 2.52mmol) in CH<sub>2</sub>Cl<sub>2</sub> (15ml). After being stirred at room temperature for 18 h, the reaction mixture was quenched with water and extracted with CHCl<sub>3</sub>. The extract was washed with brine, dried, and concentrated. The residue was purified by silica gel column chromatography (hexane:EtOAc = 2:1) to give **10** (390 mg, 77%) as a colorless oil: [ $\alpha$ ]<sub>D</sub><sup>24</sup> -18.8° (*c* 1.01, CHCl<sub>3</sub>); <sup>1</sup>H NMR (300 MHz, CDCl<sub>3</sub>)  $\delta$  2.40 (dd, *J* = 7.8, 14.1 Hz, 0.1H), 2.49 (dd, *J* = 4.5, 14.1 Hz, 0.1H), 2.75 (dd, *J* = 3.3, 12.3 Hz, 0.9H), 2.81 (d, *J* = 12.3 Hz, 0.9H), 2.97 (br s, 1H), 3.21 (s, 0.3H), 3.22 (s,

2.7H), 3.62 (s, 1.8H), 3.69 (s, 3H), 4.53 (br q, 0.1H), 4.62 (br q,  $J = 5.7$  Hz, 0.9H), 5.15 (dt,  $J = 1.5$ , 10.5 Hz, 0.9H), 5.16 (dt,  $J = 1.5$ , 10.5 Hz, 0.1H), 5.31 (dt,  $J = 1.5$ , 17.4 Hz, 0.9H), 5.33 (dt,  $J = 1.5$ , 17.1 Hz, 0.1H), 5.47 (br s, 0.1H), 5.87 (ddd,  $J = 5.4$ , 10.5, 17.4 Hz, 0.9H), 5.91 (ddd,  $J = 5.7$ , 10.5, 17.1 Hz, 0.1H);  $^{13}\text{C}$  NMR (75 MHz,  $\text{CDCl}_3$ )  $\delta$  32.1 (minor), 43.4 (minor), 48.4, 49.5, 61.5, 68.6, 70.3 (minor), 88.3, 115.1, 139.0, 139.6 (minor), 167.8, 203.8; FT-IR (neat) 3417, 1718, 1641, 1429,  $1390\text{ cm}^{-1}$ ; HRMS (EI) calcd for  $\text{C}_9\text{H}_{15}\text{NO}_4$  ( $\text{M}^+$ ): 201.1001, found: 201.0988.

**(3*S*,5*S*)-*N*-Methoxy-*N*-methyl-3,5-dihydroxy-6-heptenamide (11).**

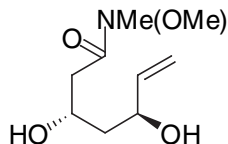

A mixture of  $\text{Me}_4\text{NBH}(\text{OAc})_3$  (2.54 g, 9.66 mmol) in acetone-AcOH (1:1 mixture, 10 ml) was stirred at room temperature for 30 min. The resulting mixture was cooled to  $-40\text{ }^\circ\text{C}$  and a solution of **10** (160 mg, 0.80 mmol) in acetone (5 ml) was added. After being stirred at  $-40\text{ }^\circ\text{C}$  for 34 h, the reaction mixture was quenched by the addition of 20% potassium sodium tartrate and saturated  $\text{NaHCO}_3$  and extracted with  $\text{CHCl}_3$ . The extract was washed with brine, dried, and concentrated. The residue was purified by silica gel column chromatography (hexane:EtOAc = 1:1) to give **11** (143 mg, 88%) as a colorless oil:  $[\alpha]_D^{27} +39.2^\circ$  ( $c$  1.37,  $\text{CHCl}_3$ );  $^1\text{H}$  NMR (300 MHz,  $\text{CDCl}_3$ )  $\delta$  1.64 (ddd,  $J = 3.0$ , 7.8, 14.1 Hz, 1H), 1.82 (ddd,  $J = 3.3$ , 9.3, 14.1 Hz, 1H), 2.57 (dd,  $J = 9.0$ , 17.1 Hz, 1H), 2.65 (br d,  $J = 17.1$  Hz, 1H), 3.19 (s, 3H), 3.68 (s, 3H), 4.20 (br s, 1H), 4.37 (br t,  $J = 9.3$  Hz, 1H), 4.46 (br s, 1H), 5.13 (dt,  $J = 1.5$ , 10.2 Hz, 1H), 5.31 (dt,  $J = 1.5$ , 17.0 Hz, 1H), 5.93 (ddd,  $J = 5.1$ , 10.2, 17.0 Hz, 1H);  $^{13}\text{C}$  NMR (75 MHz,  $\text{CDCl}_3$ )  $\delta$  31.9, 38.2, 42.1, 61.3, 65.6, 70.0, 114.2, 140.8, (C=O was not detected); FT-IR (neat) 3365, 1630, 1423, 1390,  $1063\text{ cm}^{-1}$ .

**(3*S*,5*S*)-*N*-Methoxy-*N*-methyl-3,5-di[(*tert*-butyldimethylsilyl)oxy]-6-heptenamide (12).**

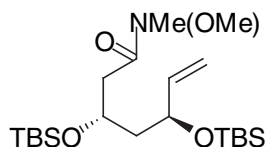

A solution of **11** (63 mg, 0.30 mmol), *tert*-butyldimethylsilyl chloride (310 mg, 2.06 mmol), and imidazole (130 mg, 1.91 mmol) in DMF (5 ml) was stirred at room temperature for 10 h. The reaction mixture was diluted with  $\text{Et}_2\text{O}$ , washed with water and brine, dried, and concentrated. The residue was purified by silica gel column chromatography (hexane:EtOAc = 20:1) to give **12** (117 mg, 87%) as a colorless oil;  $[\alpha]_D^{24} +21.1^\circ$  ( $c$  1.01,  $\text{CHCl}_3$ );  $^1\text{H}$  NMR (300MHz,  $\text{CDCl}_3$ )  $\delta$  0.03 (s, 3H), 0.04 (s, 3H), 0.07 (s, 3H), 0.08 (s, 3H), 0.86 (s, 9H), 0.89 (s, 9H), 1.64-1.85 (m, 2H), 1.69 (dt,  $J = 13.8$ , 5.1 Hz, 1H), 1.80 (dt,  $J = 13.8$ , 6.6 Hz, 1H), 2.44 (dd,  $J = 4.8$ , 14.7 Hz, 1H), 2.77 (br dd,  $J = 7.8$ , 14.7 Hz, 1H), 3.17 (s, 3H), 3.69 (s, 3H), 4.18 (q,  $J = 6.6$  Hz, 1H), 4.27-4.35 (m, 1H), 5.05 (ddd,  $J = 0.9$ , 1.8, 10.2 Hz), 5.25 (dt,  $J = 1.2$ , 17.1 Hz, 1H), 5.83 (ddd,  $J = 6.9$ , 10.2, 17.1 Hz, 1H);  $^{13}\text{C}$  NMR (75 MHz,  $\text{CDCl}_3$ )  $\delta$  -4.53, -4.41, -4.36, -3.85, 18.1, 18.3, 25.9, 26.0, 32.1, 40.6, 47.0, 61.3, (66.9), 67.2, 71.9, 114.4, 141.9; FT-IR (neat) 1668, 1466, 1254,  $1084\text{ cm}^{-1}$ ; HRMS (EI) calcd for  $\text{C}_{21}\text{H}_{45}\text{NO}_4\text{Si}_2$  ( $\text{M}^+$ ): 431.2887, found: 431.2934.

**(5*S*,7*S*)-5,7-Di[(*tert*-butyldimethylsilyl)oxy]nona-1,8-diene-3-one (4).**

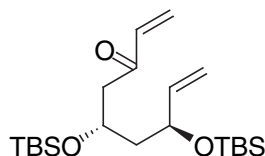

To an ice-cooled solution of **12** (230 mg, 0.53 mmol) in THF (5 ml) was added vinylmagnesium bromide (1.12 M in THF, 1.5 ml, 1.68 mmol). After being stirred at 0 °C for 7h, the reaction mixture was quenched with saturated NH<sub>4</sub>Cl and extracted with CHCl<sub>3</sub>. The extract was washed with brine, dried over, and concentrated. The residue was purified by silica gel column chromatography (hexane:EtOAc = 100:1) to give **4** (206 mg, 98%) as a colorless oil; [ $\alpha$ ]<sub>D</sub><sup>23</sup> +20.4° (*c* 1.19, CHCl<sub>3</sub>); <sup>1</sup>H NMR (500 MHz, CDCl<sub>3</sub>)  $\delta$  0.00 (s, 3H), 0.03 (s, 3H), 0.06 (s, 3H), 0.07 (s, 3H), 0.84 (s, 9H), 0.88 (s, 9H), 1.68 (ddd, *J* = 14.0, 6.0, 5.5, Hz, 1H), 1.75 (dt, *J* = 14.0, 6.5, Hz, 1H), 2.68 (dd, *J* = 4.5, 14.5 Hz, 1H), 2.82 (dd, *J* = 7.5, 14.5 Hz, 1H), 4.18 (q, *J* = 6.5 Hz, 1H), 4.30 (tt, *J* = 5.0, 7.5 Hz, 1H), 5.05 (ddd, *J* = 1.0, 1.5, 10.5 Hz, 1H), 5.15 (dt, *J* = 1.5, 17.0 Hz, 1H), 5.81 (ddd, *J* = 7.0, 10.5, 17.0 Hz, 1H), 5.82 (dd, *J* = 1.0, 10.5 Hz, 1H), 6.19 (dd, *J* = 1.0, 17.5 Hz, 1H), 6.35 (dd, *J* = 10.5, 17.5 Hz, 1H); <sup>13</sup>C NMR (75MHz, CDCl<sub>3</sub>)  $\delta$  -4.6, -4.4, -4.3, -3.9, 18.1, 18.3, 25.9, 26.0, 46.8, 48.0, 67.0, 71.8, 114.5, 128.3, 137.5, 141.8, 199.4; FT-IR (neat) 1687, 1468, 1403, 1254, 1082 cm<sup>-1</sup>; HRMS (EI) calcd for C<sub>20</sub>H<sub>39</sub>O<sub>3</sub>Si<sub>2</sub> (M<sup>+</sup>-CH<sub>3</sub>) 383.2438, found 383.2437.

**(*Z*,5*S*,7*S*)-[5,7-Di[(*tert*-butyldimethylsilyl)oxy]-3-[(trifluoromethanesulfonyl)oxy]nona-2,8-dienyl]diphenylphosphine Oxide (7).**

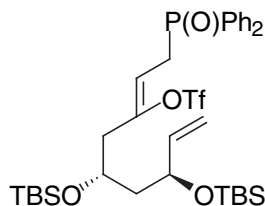

To an ice-cooled solution of Ph<sub>2</sub>P(O)H (88 mg, 0.436 mmol) in THF (1.3 ml) was added *n*-BuLi (1.59 M in hexane, 0.27 ml, 0.429 mmol) and the mixture was stirred at 0 °C for 1 h. The mixture was cooled to -78 °C and a solution of **4** (144 mg, 0.362 mmol) in THF (2 ml) was added. The resulting mixture was stirred at -78 °C for 30 min and a solution of 2-[*N,N*-bis(trifluoromethylsulfonyl)amino]-5-chloropyridine<sup>2</sup> (227 mg, 0.578 mmol) in THF (1.7 ml) was added. After being stirred at -78 °C for 20 h, the reaction mixture was diluted with Et<sub>2</sub>O, washed with water and brine, dried over, and concentrated. The residue was purified by silica gel column chromatography (hexane:EtOAc = 2:1) to give **7** (236 mg, 89%) and **13** (16 mg, 7%) each as a colorless oil.

Enol triflate **7**: [ $\alpha$ ]<sub>D</sub><sup>24</sup> +13.7° (*c* 1.44, CHCl<sub>3</sub>); <sup>1</sup>H NMR (500 MHz, CDCl<sub>3</sub>)  $\delta$  -0.02 (s, 3H), 0.02 (s, 3H), 0.03 (s, 6H), 0.83 (s, 9H), 0.87 (s, 9H), 1.40 (ddd, *J* = 14.0, 6.9, 4.8 Hz, 1H), 1.47 (ddd, *J* = 14.0, 7.5, 5.0 Hz, 1H), 2.45 (dd, *J* = 14.0, 6.6 Hz, 1H), 2.50 (dd, *J* = 14.0, 5.3 Hz, 1H), 3.14 (dt, *J* = 15.5, 6.0 Hz, 1H), 3.33 (ddd, *J* = 5.5, 11.7, 8.9 Hz, 1H), 3.98 (quint, *J* = 6.4 Hz, 1H), 4.12 (dt, *J* = 7.5, 5.0 Hz, 1H), 5.01 (ddd, *J* = 11.0, 1.6, 0.7 Hz, 1H), 5.08 (dt, *J* = 17.0, 1.6 Hz, 1H), 5.61-5.68 (m, 2H), 7.46-7.56 (m, 2H), 7.71-7.76 (m, 4H); <sup>13</sup>C NMR (75 MHz, CDCl<sub>3</sub>)  $\delta$  -4.7, -4.3, -4.1, -3.6, 18.0, 18.2, 25.9, 28.5, 29.4, 42.4, 45.6, 66.2, 71.4, 113.6, 113.7, 114.7, 128.8, 129.0, 130.8, 130.9, 131.0, 132.3, 141.7, 148.8; FT-IR (neat) 1410, 1252, 1211, 1134, 1090 cm<sup>-1</sup>; HRMS (EI) calcd for C<sub>30</sub>H<sub>43</sub>F<sub>3</sub>O<sub>6</sub>PSi<sub>2</sub> (M<sup>+</sup>-C<sub>4</sub>H<sub>9</sub>) 675.2009, found 675.2021.

Ketone **13**: [ $\alpha$ ]<sub>D</sub><sup>24</sup> +12.6° (*c* 1.11, CHCl<sub>3</sub>); <sup>1</sup>H NMR (300 MHz, CDCl<sub>3</sub>)  $\delta$  -0.08 (s, 3H), 0.00

(s, 3H), 0.01 (s, 3H), 0.03 (s, 3H), 0.77 (s, 9H), 0.85 (s, 9H), 1.54-1.71 (m, 2H), 2.40-2.86 (m, 6H), 4.09 (q,  $J = 6.6$  Hz, 1H), 4.18 (tt,  $J = 6.9, 5.1$  Hz, 1H), 5.02 (d,  $J = 10.2$  Hz, 1H), 5.09 (dt,  $J = 17.1, 1.2$  Hz, 1H), 5.74 (ddd,  $J = 17.1, 10.2, 6.6$  Hz, 1H), 7.41-7.54 (m, 6H), 7.68-7.76 (m, 4H);  $^{13}\text{C}$  NMR (75 MHz,  $\text{CDCl}_3$ )  $\delta$  -4.6, -4.5, -4.3, -3.9, 17.9, 18.2, 22.7, 23.7, 25.8, 25.9, 36.1, 36.2, 46.4, 50.7, 66.8, 71.7, 114.6, 128.8, 128.9, 130.7, 130.9, 131.9, 132.0, 141.5, 206.9, 207.1; FT-IR (neat) 1716, 1468, 1437, 1409, 1254, 1188, 1074  $\text{cm}^{-1}$ ; HRMS (EI) calcd for  $\text{C}_{32}\text{H}_{50}\text{O}_4\text{PSi}_2$  ( $\text{M}^+ - \text{CH}_3$ ) 585.2985, found 585.3044.

### Palladium-Catalyzed Cyclization of Enol Triflate 7.

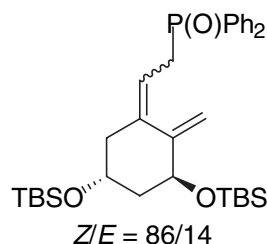

A solution of **7** (288 mg, 0.393 mmol) in THF (8 ml) was degassed thoroughly by three times repetition of filling up with argon after suction. To this solution were added  $\text{Ph}_3\text{P}$  (10 mg, 0.038 mmol),  $\text{Et}_3\text{N}$  (66  $\mu\text{l}$ , 0.474 mmol), and  $\text{Pd}(\text{OAc})_2$  (9 mg, 0.039 mmol) and the mixture was stirred at room temperature for 6.5 h. The reaction mixture was diluted with  $\text{Et}_2\text{O}$ , filtered through Celite, and concentrated. The residue was purified by silica gel column chromatography (hexane:EtOAc = 2:1) to give a 86:14 mixture of **2** and its *E*-isomer (215 mg, 94 %);  $^1\text{H}$  NMR (300 MHz,  $\text{CDCl}_3$ )  $\delta$  -0.05 (s, 3H), -0.01 (s, 3H), 0.01 (s, 3H), 0.03 (s, 3H), 0.80 (s, 9H), 0.87 (s, 9H), 1.64-1.77 (m, 1H), 1.82-1.90 (m, 1H), 2.15 (br d,  $J = 11.7$  Hz, 1H), 2.32 (br d,  $J = 12.9$  Hz, 1H), 3.14 (dt,  $J = 6.9, 15.0$  Hz, 1H), 3.38 (dt,  $J = 8.7, 15.0$  Hz, 1H), 4.11 (m, 1H), 4.35 (m, 1H), 4.73 (s, 1H), 4.79 (s, 0.14H), 5.14 (s, 0.86H), 5.33 (dt,  $J = 8.0, 6.9$  Hz, 0.86H), 5.54 (dt,  $J = 9.0, 6.6$  Hz, 0.14H), 7.38-7.53 (m, 6H), 7.65-7.76 (m, 1H);  $^{13}\text{C}$  NMR (75 MHz,  $\text{CDCl}_3$ )  $\delta$  -4.9, -4.8, -4.7, 18.1, 18.3, 25.8, (30.5), 30.9, (31.4), 31.8, (37.1), (43.9), 44.8, 45.6, (66.7), 67.5, (70.6), 70.9, (108.6), 110.3, (114.8), (114.9), 115.1, 115.2, 128.5, 128.7, 131.0, 131.1, 131.2, 131.8, (132.1), 132.4, 133.4, (133.7), 141.0, 141.1, 147.8, peaks in parentheses are attributed to the *E*-isomer; FT-IR (neat) 1469, 1254, 1084  $\text{cm}^{-1}$ ; HRMS (EI) calcd for  $\text{C}_{33}\text{H}_{51}\text{O}_3\text{PSi}_2$  ( $\text{M}^+$ ) 582.3114, found 582.3083.

### (*Z*,3*S*,5*R*)-2-[[3,5-Di(*tert*-butyldimethylsilyl)oxy-2-methylenecyclohexylidene]ethyl]diphenylphosphine oxide (**2**).

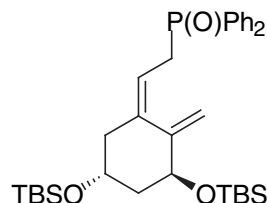

A solution of the above-mentioned *Z/E*-mixture (97 mg, 0.167 mmol) and 9-fluorenone (3.1 mg, 0.017 mol) in *t*-BuOMe (6.6 ml) was irradiated with a medium pressure mercury arc lamp for 3 h. The reaction mixture was concentrated and chromatographed (hexane:EtOAc = 2:1) to give **2** (92 mg, 95 %);  $[\alpha]_{\text{D}}^{24} -2.9^\circ$  ( $c$  1.43,  $\text{CHCl}_3$ ),  $[\alpha]_{\text{D}}^{24} -2.6^\circ$  ( $c$  1.21, EtOH) [lit.<sup>3</sup>  $[\alpha]_{\text{D}}^{25} -2.3^\circ$  ( $c$  0.5, EtOH)];  $^1\text{H}$  NMR (500 MHz,  $\text{CDCl}_3$ )  $\delta$  -0.03 (s, 3H), 0.01 (s, 3H), 0.03 (s, 3H), 0.05 (s, 3H), 0.82 (s, 9H), 0.89 (s, 9H), 1.71 (ddd,  $J = 2.5, 8.5, 9.5$  Hz, 1H), 1.84-1.89 (m, 1H), 2.17 (dd,  $J = 5.0, 13.3$ , 1H), 2.33 (d,  $J = 13.3$  Hz, 1H), 3.16 (dt,  $J = 6.6, 15.3$  Hz, 1H), 3.39 (dt,  $J = 8.7, 15.3$  Hz, 1H), 4.12

(quint.  $J = 2.5$  Hz, 1H), 4.36 (q,  $J = 4.1$  Hz, 1H), 4.74 (dd,  $J = 1.6, 2.0$  Hz, 1H), 5.15 (dd,  $J = 1.8, 2.0$  Hz, 1H), 5.34 (dt,  $J = 8.0, 6.9$  Hz, 1H), 7.43-7.47 (m, 4H), 7.49-7.53 (m, 2H), 7.69-7.74 (m, 4H);  $^{13}\text{C}$  NMR (75 MHz,  $\text{CDCl}_3$ )  $\delta$  -4.9, -4.8, -4.7, 18.2, 18.3, 25.9, 31.0, 31.9, 44.9, 45.6, 67.5, 70.9, 110.3, 115.1, 115.2, 128.5, 128.7, 131.1, 131.2, 131.8, 132.5, 133.5, 141.0, 141.1, 147.8; FT-IR (neat) 1467, 1253, 1201, 1083  $\text{cm}^{-1}$ ; HRMS (EI) calcd for  $\text{C}_{33}\text{H}_{51}\text{O}_3\text{PSi}_2$  ( $\text{M}^+$ ) 582.3114, found 582.3098.

## References

- (1) Anné, S.; Yong, W.; Vandewalle, M. *Synlett* **1999**, 1435.
- (2) Comins, D. L.; Dehghani, A. *Tetrahedron Lett.* **1992**, 33, 6299.
- (3) Baggiolini, E. G.; Iacobelli, J. A.; Hennessy, B. M.; Batcho, A. D.; Sereno, J. F.; Uskokovic, M. *R. J. Org. Chem.* **1986**, 51, 3098.
